# Supplementary material
Source: publisher figshare collection journal article supplement (https://acs.figshare.com/ndownloader/files/11756000)
Supplement: Supplementary file 1 [file 11756000]

## Supporting Information

### Solvent dependent formation of three new Bi-MOFs using a tetracarboxylic acid

Milan Köppen,<sup>†</sup> Vanessa Meyer,<sup>†</sup> Jonas Ångström,<sup>‡</sup> A. Ken Inge<sup>\*,‡</sup> and Norbert Stock<sup>\*,†</sup>

<sup>†</sup> M. Köppen, V. Meyer, Prof. Dr. N. Stock  
Institut für Anorganische Chemie  
Christian-Albrechts-Universität zu Kiel  
Max-Eyth Str. 2, 24118 Kiel (Germany)  
E-mail: stock@ac.uni-kiel.de

<sup>‡</sup> Dr. A. K. Inge, Dr. J. Ångström  
Department of Materials and Environmental Chemistry  
Stockholm University, Stockholm SE-106 91 (Sweden)

\* correspondence to:

stock@ac.uni-kiel.de

andrew.inge@mmk.su.se

## Table of Contents

|                                             |    |
|---------------------------------------------|----|
| 1. Synthesis.....                           | 3  |
| 2. Scanning electron microscopy (SEM) ..... | 3  |
| 3. Crystallographic information.....        | 4  |
| 3.1. CAU-31.....                            | 4  |
| 3.2. CAU-32.....                            | 8  |
| 3.3. $\beta$ -CAU-33 .....                  | 10 |
| 3.4. $\alpha$ -CAU-33 .....                 | 14 |
| 4. PXRD analyses.....                       | 15 |
| 5. Thermogravimetric analyses .....         | 17 |
| 6. Sorption measurements.....               | 19 |
| 6.1. CAU-31.....                            | 19 |
| 6.2. CAU 32 .....                           | 20 |
| 6.3. CAU-33.....                            | 21 |
| 7. Infrared spectra .....                   | 22 |
| 8. NMR spectroscopy.....                    | 24 |
| 9. Chemical stability tests.....            | 25 |
| 9.1. CAU-31.....                            | 25 |
| 9.2. CAU-32.....                            | 26 |
| 9.3. CAU-33.....                            | 28 |
| 10. References .....                        | 30 |

## 1. Synthesis

The optimized synthesis conditions of CAU-31-33 can be found in the experimental section of the article. The table of starting materials in the high-throughput reaction (manuscript Fig. 2) is shown in Table S1.

**Table S1:** Starting materials used in high-throughput reactions in a multiclave with 2 mL PTFE liners. The reactions were performed four times with heating for 1 h to target temperature (T), holding T for 12 h, and ramp down to room temperature for 1 h (with T = 80 °C, 100 °C, 120 °C, 140 °C).

| molar ratio |       |                          |                                                          |              |                |
|-------------|-------|--------------------------|----------------------------------------------------------|--------------|----------------|
| linker      | metal | H <sub>4</sub> TCPB / mg | Bi(NO <sub>3</sub> ) <sub>3</sub> ·H <sub>2</sub> O / mg | Solvent 1    | Solvent 2      |
| 1           | 1     | 5.0                      | 4.3                                                      | 1000 µl MeOH |                |
| 1           | 2     | 5.0                      | 8.7                                                      | 1000 µl MeOH |                |
| 1           | 1     | 5.0                      | 4.3                                                      | 800 µl MeOH  | 200 µl DMF     |
| 1           | 2     | 5.0                      | 8.7                                                      | 800 µl MeOH  | 200 µl DMF     |
| 1           | 1     | 5.0                      | 4.3                                                      | 900 µl DMF   | 100 µl toluene |
| 1           | 2     | 5.0                      | 8.7                                                      | 900 µl DMF   | 100 µl toluene |

## 2. Scanning electron microscopy (SEM)

The SEM micrographs of CAU-31-33 are shown in Fig. S1.

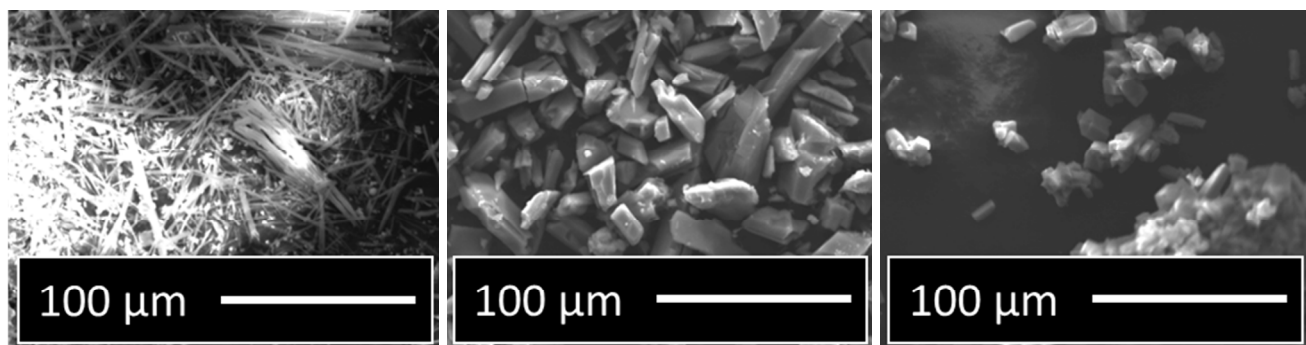

**Fig. S1:** SEM micrographs of CAU-31 (left), CAU-32 (*as*, middle) and β-CAU-33 (right).

### 3. Crystallographic information

#### 3.1. CAU-31

Structure refinement was performed in TOPAS Academic 6<sup>1</sup> on a PXRD pattern in a range of 2 to 70° 2 $\theta$  using the Rietveld method. Both crystallographically independent TCPB linkers were located on an inversion center and described using z-matrices, with the possibility to rotate the carboxylate groups and phenyl rings. Bond lengths inside the rigid body were each refined with one parameter, such as the  $C_{\text{phenyl}}C_{\text{phenyl}}$ -distance. The structural starting model for the Rietveld refinement was obtained from continuous rotation electron diffraction data (Fig. S2). Continuous rotation electron diffraction<sup>2</sup> datasets were collected on a high-speed hybrid-detection camera (Timepix Quad) in a JEOL JEM-2100 electron microscope with a LaB<sub>6</sub> source ( $\lambda = 0.0251 \text{ \AA}$ ) in video mode from 12 crystals on lacey carbon on a copper grid using a cryo holder at -110 °C. Approximate lattice parameters and the space group were determined using REDp,<sup>3</sup> after which data reduction was performed in XDS.<sup>4</sup> The structure was successfully solved using dataset 4 (with a goniometer tilt from -40° to 58°, reduced from 879 images with an exposure time of 0.25 s, a completeness of 0.58 and  $R_{\text{int}}$  of 0.097) in ShelXT.<sup>5</sup> The crystallographic data is given in Table S2 based on the Rietveld refinement (Fig. S3).

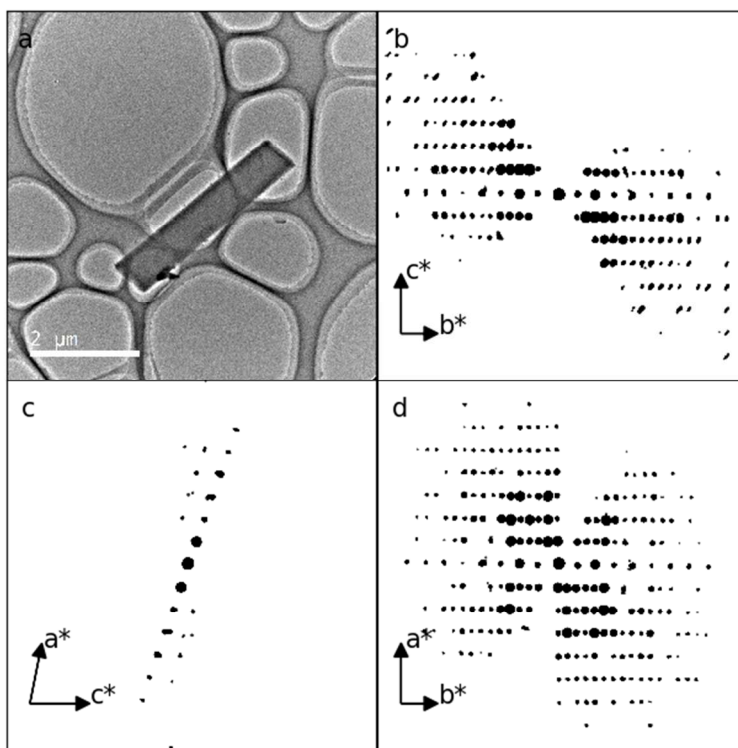

**Fig. S2:** TEM micrograph (a) and slices of the reconstructed reciprocal space (b, c, d) of CAU-31. Slices show (b)  $0kl$ , (c)  $h0l$  and (d)  $hk0$ . The only obvious reflection condition is  $k=2n$  in  $0kl$  and  $hk0$ . Information about conditions on  $l$  is lacking and some of the reflections seem to overlap.

**Table S2:** Crystallographic data and Rietveld refinement details on  $[\text{Bi}_2(\text{H}_2\text{TCPB})(\text{TCPB})(\text{H}_2\text{O})_2] \cdot x\text{H}_2\text{O}$  (CAU-31).

|                                  |                                                                                                                          |
|----------------------------------|--------------------------------------------------------------------------------------------------------------------------|
| Identification code              | CAU-31                                                                                                                   |
| Crystal system                   | Monoclinic                                                                                                               |
| Space group                      | $P2_1/c$                                                                                                                 |
| Unit cell dimensions             | $a = 11.5261(5) \text{ \AA}$<br>$b = 28.265(2) \text{ \AA}$<br>$c = 11.575(2) \text{ \AA}$<br>$\beta = 104.647(7)^\circ$ |
| Volume                           | $3648.4(5) \text{ \AA}^3$                                                                                                |
| 2Theta range for data collection | 2 to $70^\circ$                                                                                                          |
| Wavelength                       | $1.5406 \text{ \AA}$                                                                                                     |
| Refinement method                | Rietveld                                                                                                                 |
| $R_{\text{wp}}$                  | 8.64 %                                                                                                                   |
| $R_{\text{exp}}$                 | 2.26 %                                                                                                                   |
| GoF                              | 3.81                                                                                                                     |

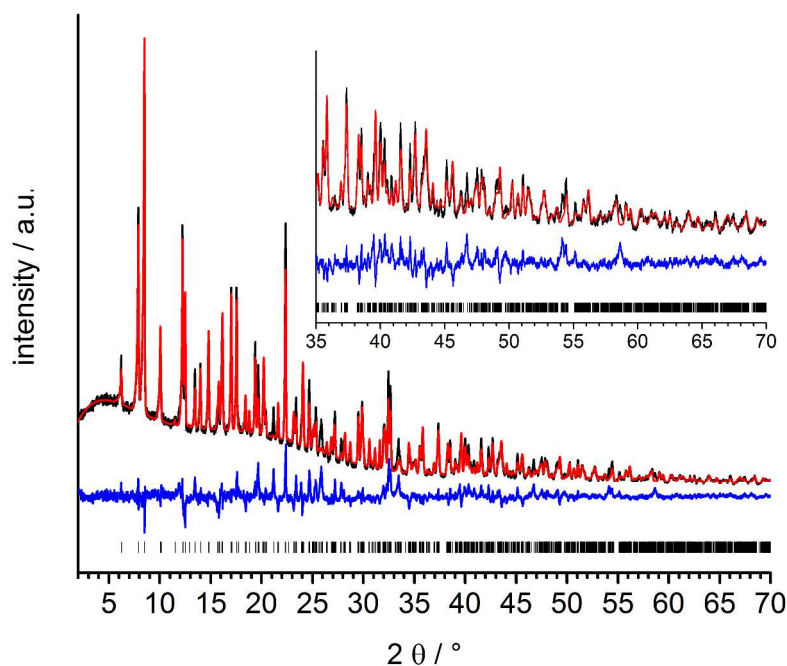

**Fig. S3:** Rietveld plot of the refinement of  $[\text{Bi}_2(\text{H}_2\text{TCPB})(\text{TCPB})(\text{H}_2\text{O})_2] \cdot x\text{H}_2\text{O}$  (CAU-31). Experimental and theoretical PXRD pattern shown as black and red line, respectively. The difference is drawn in blue, while the positions of the allowed reflections are indicated by black bars. The small deviations between observed and calculated intensities are probably due to the mobile guest molecules in the pores which were modelled as oxygen atoms.

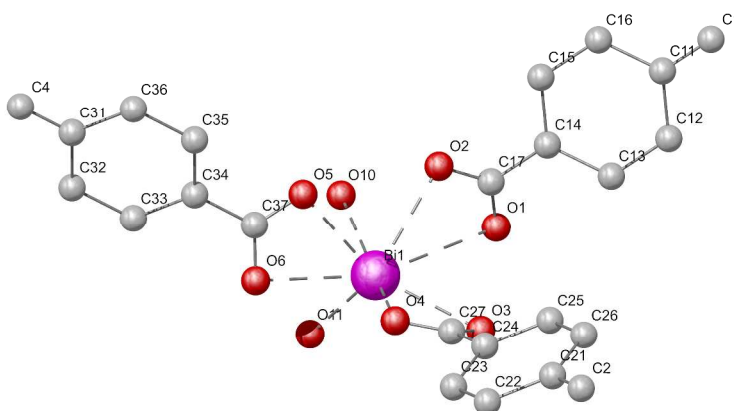

**Fig. S4:** Coordination sphere around the  $\text{Bi}^{3+}$  ion in CAU-31.

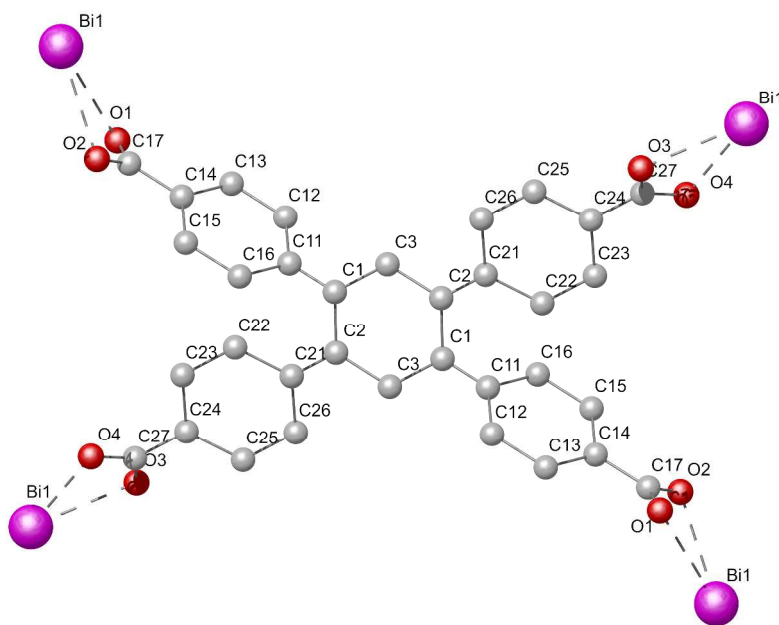

**Fig. S5:** Connection of  $\text{Bi}^{3+}$  ions by one  $\text{TCPB}^{4-}$  ion in CAU-31.

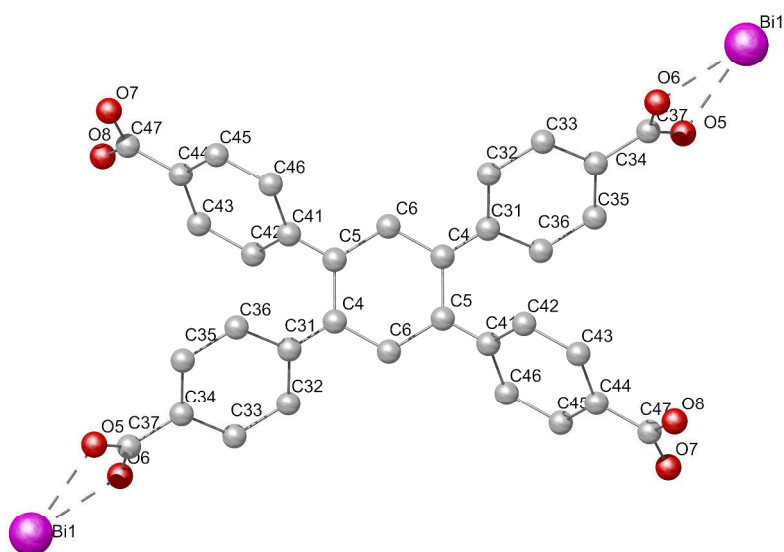

**Fig. S6:** Connection of  $\text{Bi}^{3+}$  ions by one  $\text{H}_2\text{TCPB}^{2-}$  ion in CAU-31.

### 3.2. CAU-32

A detailed description of the crystal structure determination is provided in the experimental section of the article. The crystallographic data and refinement details on CAU-32 (*as*) are presented in Table S3.

**Table S3:** Crystallographic data and refinement details on (NH<sub>2</sub>(CH<sub>3</sub>)<sub>2</sub>)[Bi(TCPB)(H<sub>2</sub>O)] (CAU-32 (*as*)).

|                                                     |                                                                                                     |
|-----------------------------------------------------|-----------------------------------------------------------------------------------------------------|
| Identification code                                 | CAU-32                                                                                              |
| Empirical formula                                   | C <sub>17</sub> H <sub>9</sub> Bi <sub>0.5</sub> O <sub>4.5</sub>                                   |
| Formula weight                                      | 389.73                                                                                              |
| Temperature                                         | 295(2) K                                                                                            |
| Wavelength                                          | 0.71073 Å                                                                                           |
| Crystal system                                      | Monoclinic                                                                                          |
| Space group                                         | <i>P</i> 2 <sub>1</sub> / <i>n</i>                                                                  |
| Unit cell dimensions                                | <i>a</i> = 11.188(1) Å<br><i>b</i> = 24.552(2) Å<br><i>c</i> = 16.315(2) Å<br><i>β</i> = 91.365(3)° |
| Volume                                              | 4480.1(8) Å <sup>3</sup>                                                                            |
| <i>Z</i>                                            | 8                                                                                                   |
| Density (calculated)                                | 1.156 g/cm <sup>3</sup>                                                                             |
| Absorption coefficient                              | 3.973 mm <sup>-1</sup>                                                                              |
| <i>F</i> (000)                                      | 1508                                                                                                |
| Crystal size                                        | 0.12 x 0.07 x 0.05 mm <sup>3</sup>                                                                  |
| Theta range for data collection                     | 2.232 to 26.492°                                                                                    |
| Index ranges                                        | -14 ≤ <i>h</i> ≤ 13, -30 ≤ <i>k</i> ≤ 30, -20 ≤ <i>l</i> ≤ 20                                       |
| Reflections collected                               | 121023                                                                                              |
| Independent reflections                             | 9210 [ <i>R</i> (int) = 0.1756]                                                                     |
| Completeness to theta = 25.242°                     | 99.9 %                                                                                              |
| Absorption correction                               | Multi-scan                                                                                          |
| Max. and min. transmission                          | 0.7454 and 0.6211                                                                                   |
| Refinement method                                   | Full-matrix least-squares on <i>F</i> <sup>2</sup>                                                  |
| Data / restraints / parameters                      | 9210 / 6 / 397                                                                                      |
| Goodness-of-fit on <i>F</i> <sup>2</sup>            | 1.052                                                                                               |
| Final <i>R</i> indices [ <i>I</i> > 2σ( <i>I</i> )] | <i>R</i> 1 = 0.0716, <i>wR</i> 2 = 0.1328                                                           |
| <i>R</i> indices (all data)                         | <i>R</i> 1 = 0.1274, <i>wR</i> 2 = 0.1499                                                           |
| Largest diff. peak and hole                         | 1.291 and -1.244 e/Å <sup>3</sup>                                                                   |



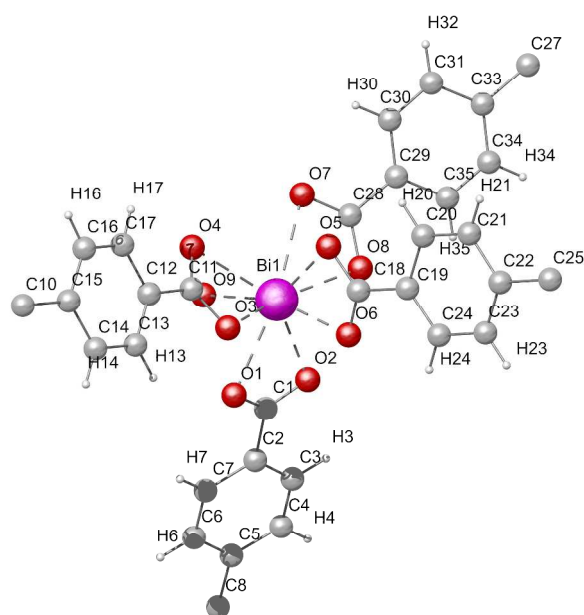

**Fig. S7:** Coordination sphere around the  $\text{Bi}^{3+}$  ion in CAU-32.

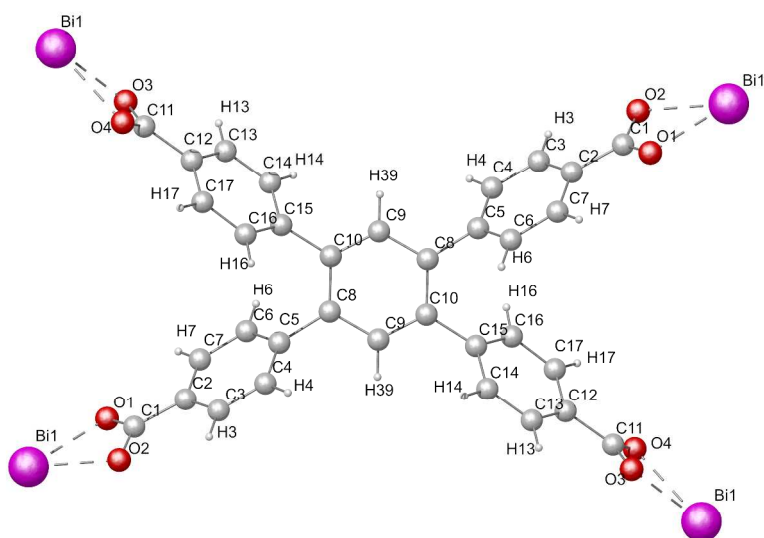

**Fig. S8:** Connection of  $\text{Bi}^{3+}$  ions by the  $\text{TCPB}^{4-}$  ion in CAU-32.

### 3.3. $\beta$ -CAU-33

The structure refinement was performed in TOPAS Academic 6<sup>1</sup> on a PXRD pattern in a range of 2 to 70° 2 $\theta$  using the Rietveld method. Since both of the crystallographically independent TCPB-linkers lie on inversion centers, half of each linker was described using z-matrices, with the possibility to rotate the carboxylate groups and phenyl rings. Bond lengths inside the rigid body were each refined with one parameter, e.g. the C<sub>phenyl</sub>C<sub>phenyl</sub>-distance. The initial structural model was obtained by single-crystal X-ray diffraction (SC-XRD) including positions of the Bi cations and the approximate positions of the organic linker molecules. However due to the small crystal size (150 x 30 x 30  $\mu$ m), overall the reflections were weak and the overall data quality was poor. Therefore, the structure was refined against X-ray powder diffraction data instead. The crystallographic data are provided in Table S4, the Rietveld plot in Fig. S9.

**Table S4:** Crystallographic data and Rietveld refinement details on [Bi<sub>4</sub>(O)<sub>2</sub>(OH)<sub>2</sub>(H<sub>2</sub>TCPB)(TCPB)(H<sub>2</sub>O)<sub>2</sub>] $\cdot$ xH<sub>2</sub>O ( $\beta$ -CAU-33).

|                                  |                                                                                                                       |
|----------------------------------|-----------------------------------------------------------------------------------------------------------------------|
| Identification code              | $\beta$ -CAU-33                                                                                                       |
| Crystal system                   | Monoclinic                                                                                                            |
| Space group                      | <i>C2/c</i>                                                                                                           |
| Unit cell dimensions             | $a = 33.001(2) \text{ \AA}$<br>$b = 22.909(2) \text{ \AA}$<br>$c = 10.435(1) \text{ \AA}$<br>$\beta = 99.53(1)^\circ$ |
| Volume                           | 7779.9(2) $\text{\AA}^3$                                                                                              |
| 2Theta range for data collection | 2 to 70°                                                                                                              |
| Refinement method                | Rietveld                                                                                                              |
| Wavelength                       | 1.5406 $\text{\AA}$                                                                                                   |
| R <sub>wp</sub>                  | 4.29 %                                                                                                                |
| R <sub>exp</sub>                 | 0.66 %                                                                                                                |
| GoF                              | 6.47                                                                                                                  |

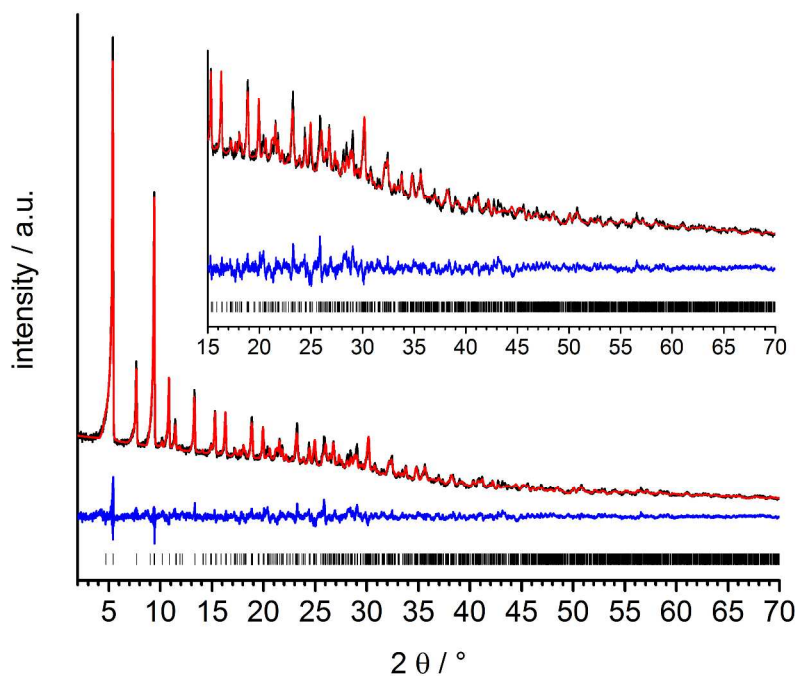

**Fig. S9:** Rietveld plot of the refinement of  $[\text{Bi}_4(\text{O})_2(\text{OH})_2(\text{H}_2\text{TCPB})(\text{TCPB})(\text{H}_2\text{O})_2] \cdot x\text{H}_2\text{O}$  ( $\beta$ -CAU-33). Experimental and theoretical PXR pattern shown as black and red line, respectively. The difference is drawn in blue, while the positions of the allowed reflections are indicated by black bars.

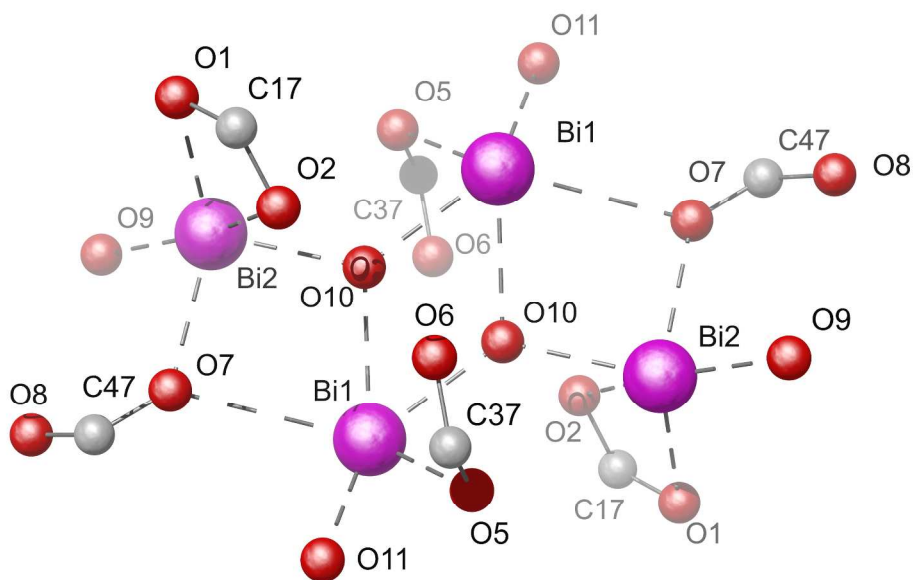

**Fig. S10:** Coordination sphere around the two symmetry independent  $\text{Bi}^{3+}$  ions in  $\beta$ -CAU-33.

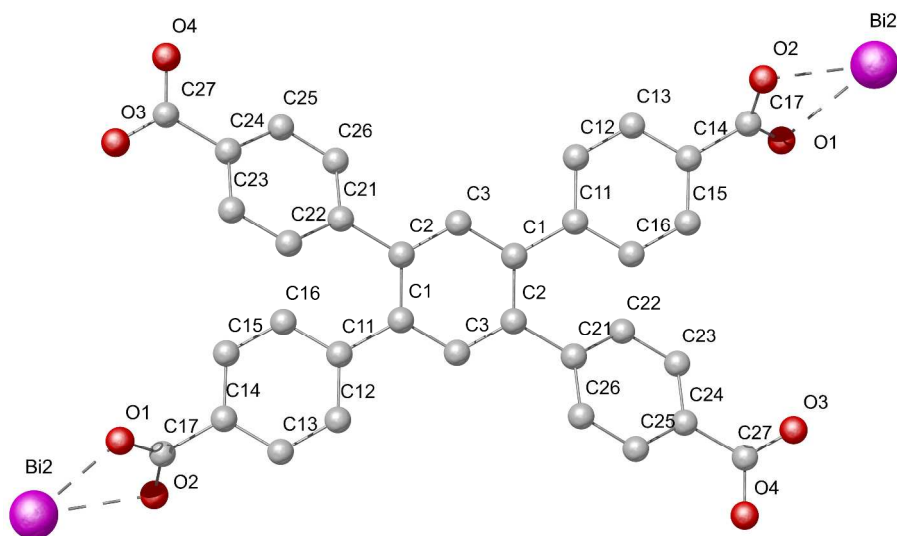

**Fig. S11:** Connection of  $\text{Bi}^{3+}$  ions by one  $\text{H}_2\text{TCPB}^{2-}$  ion in  $\beta\text{-CAU-33}$ .

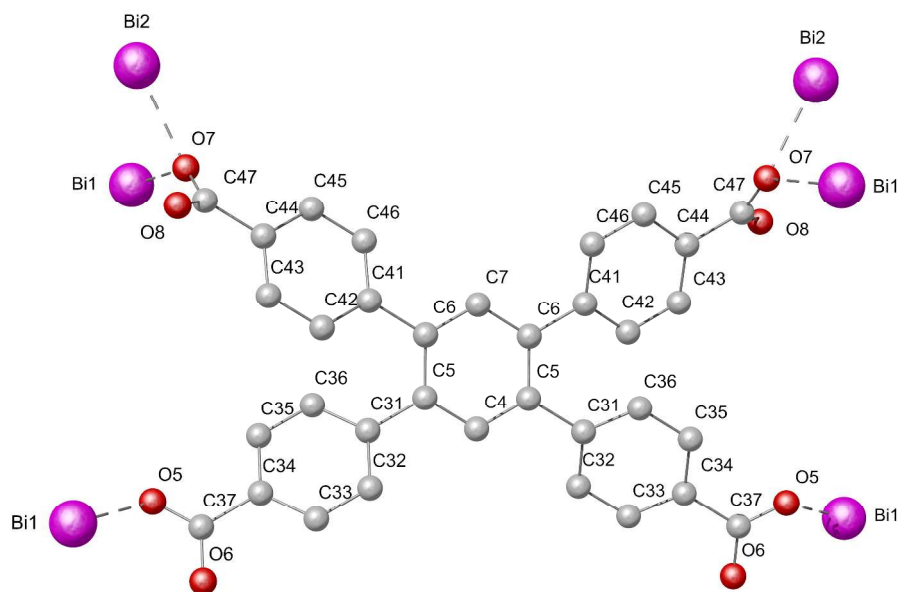

**Fig. S12:** Connection of  $\text{Bi}^{3+}$  ions by one  $\text{TCPB}^{4-}$  ion in  $\beta\text{-CAU-33}$ .

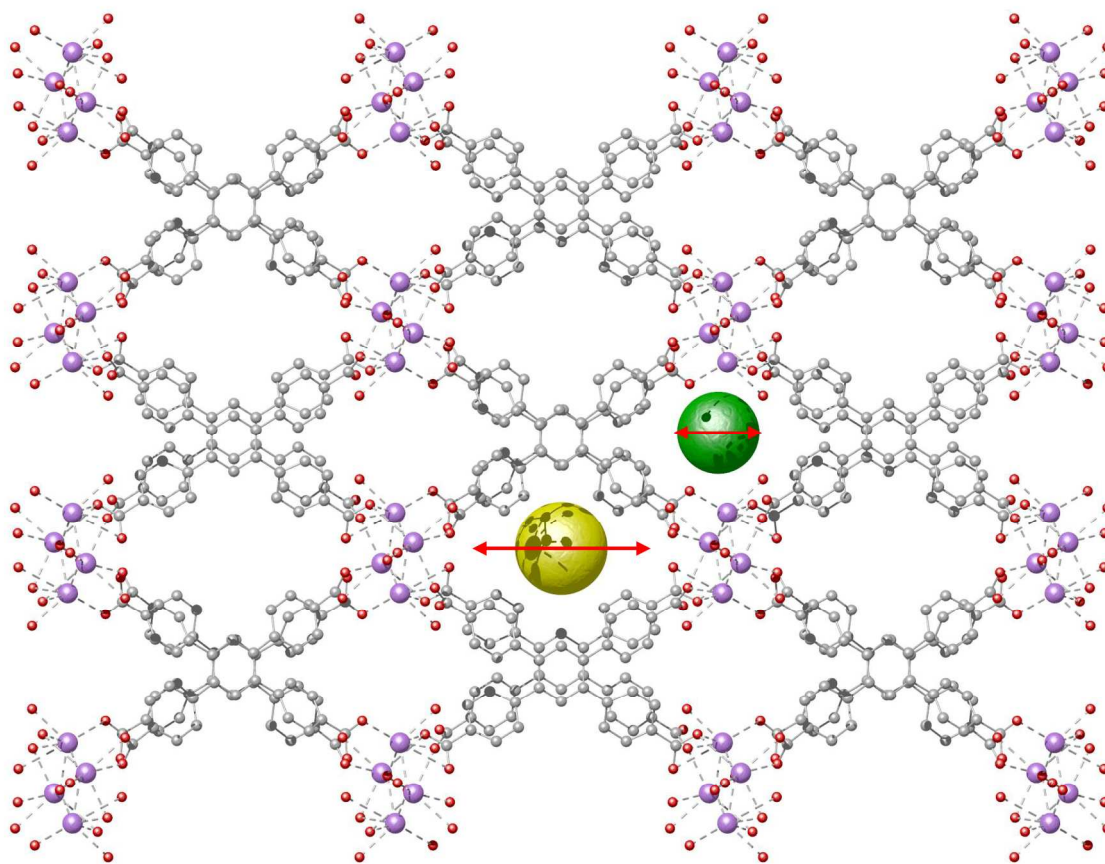

**Fig. S13:** Visualization of the two 1D lozenge-shaped channels in yellow and green in the crystal structure of  $\beta$ -CAU-33. The red arrows illustrate the dimension of the channels along [100] with  $9.5 \times 4.6 \text{ \AA}$  and  $4.4 \times 4.1 \text{ \AA}$  taking the van der Waals radii of framework atoms into account. View along [001].

### 3.4. $\alpha$ -CAU-33

The Le Bail fit (Fig. S14) was performed in TOPAS Academic 6<sup>1</sup> on a PXRD pattern in a range of 2 to 45° 2 $\theta$ . The fit details are given in Table S5.

**Table S5:** Le Bail fit details on  $\alpha$ -CAU-33.

|                                  |                                                                                                                        |
|----------------------------------|------------------------------------------------------------------------------------------------------------------------|
| Identification code              | $\alpha$ -CAU-33                                                                                                       |
| Crystal system                   | Monoclinic                                                                                                             |
| Space group                      | $C2/c$                                                                                                                 |
| Unit cell dimensions             | $a = 32.785(4) \text{ \AA}$<br>$b = 23.011(4) \text{ \AA}$<br>$c = 10.139(2) \text{ \AA}$<br>$\beta = 110.74(1)^\circ$ |
| Volume                           | $7153.63 \text{ \AA}^3$                                                                                                |
| 2Theta range for data collection | 2 to 45°                                                                                                               |
| Wavelength                       | 1.5406 $\text{\AA}$                                                                                                    |
| Refinement method                | Le Bail                                                                                                                |
| $R_{wp}$                         | 11.39 %                                                                                                                |
| $R_{exp}$                        | 6.49 %                                                                                                                 |
| GoF                              | 1.76                                                                                                                   |

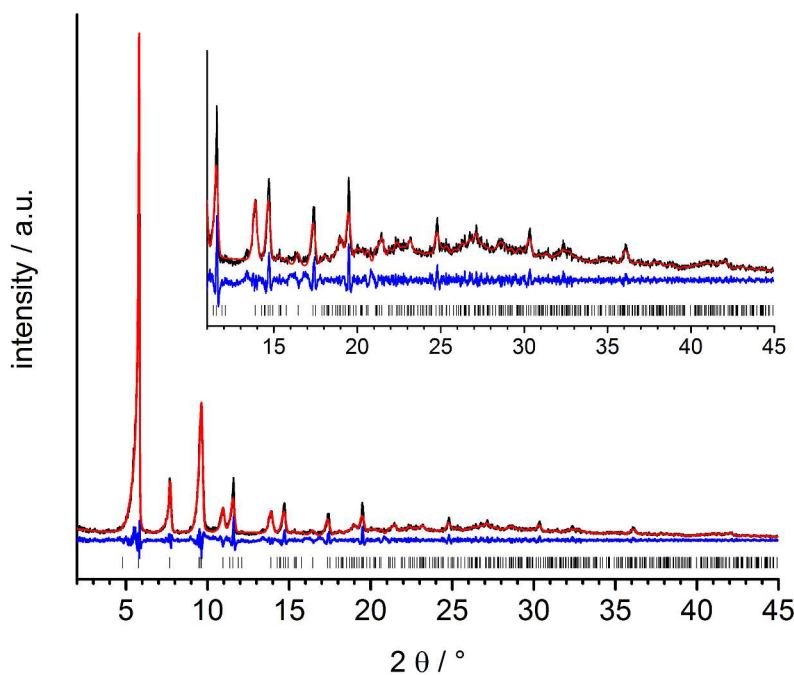

**Fig. S14:** Le Bail plot of the refinement of  $\alpha$ -CAU-33. Experimental and theoretical PXRD pattern shown as black and red line, respectively. The difference is drawn in blue, while the positions of the reflections are indicated by black bars.

#### 4. PXRD analyses

The measured and theoretical PXRD patterns of CAU-32 (*as*) are shown in Fig. S15.

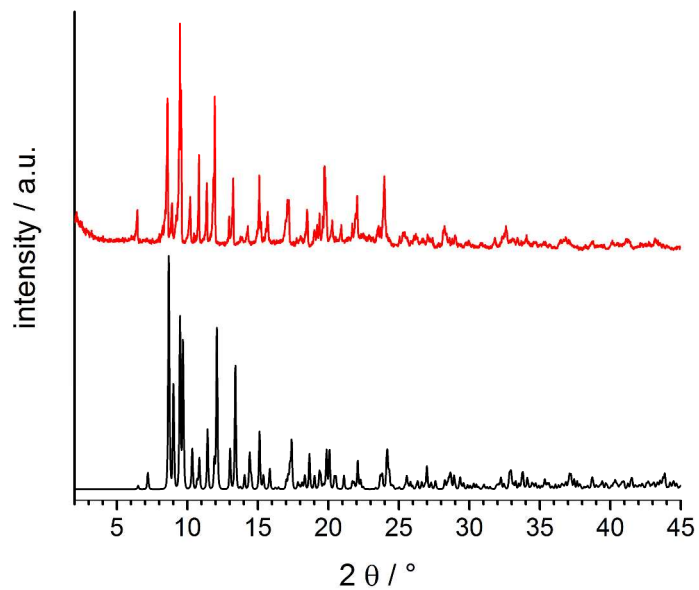

**Fig. S15:** Measured (top) and theoretical (bottom) PXRD patterns of CAU-32 (*as*).

To get more insight into the structural changes of CAU-32, a fresh sample was synthesized, stored for one day, thermally treated at 60 °C for one day and afterwards washed again with a mixture of MeOH/DMF (4:1). On every step, the sample was characterized by PXRD. The resulting PXRD patterns are shown in Fig. S16. Additionally, the PXRD pattern, which was collected during the T-dependent PXRD experiment at 200 °C (see main article), is given in the figure, as well as a pattern of an activated capillary filled with CAU-32 (activation for one hour at 150 °C at reduced pressure). None of the PXRD patterns could be indexed, which indicates that only mixtures of different structure states are obtained.

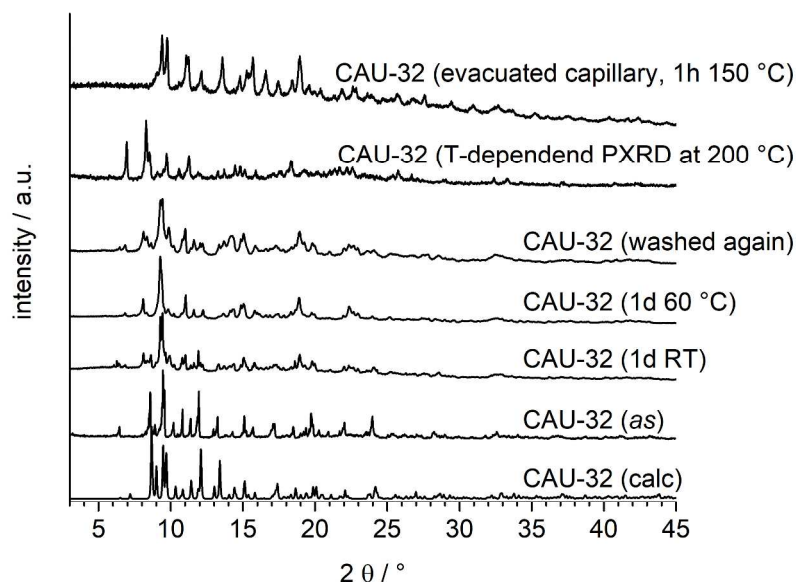

**Fig. S16:** Theoretical and measured PXRD patterns of CAU-32 upon storage and thermal treatment.



## 5. Thermogravimetric analyses

The measured TG curves of CAU-31, CAU-32 (*as*) and  $\beta$ -CAU-33 are shown in Fig. S17 - Fig. S19. The analyses of the curves are given in the figure captions.

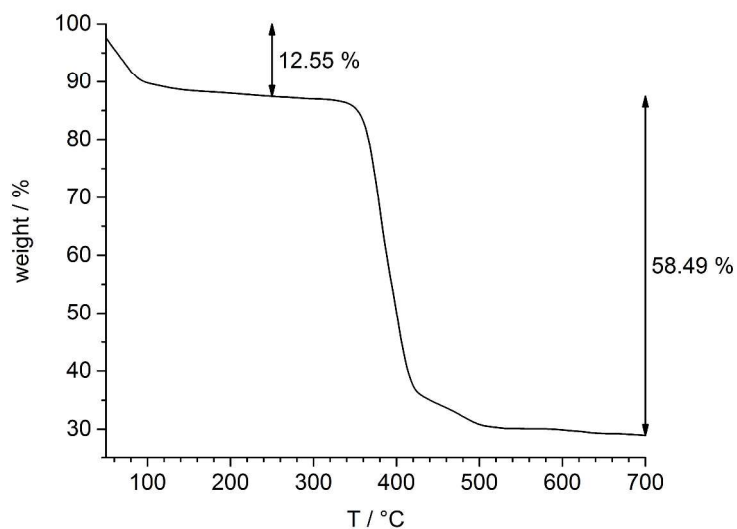

**Fig. S17:** Measured TG-curve of CAU-31. The measured weight losses match the theoretical values for the loss of water (12.84 %) and decomposition of the linker (60.60 %), calculated using the formula  $[\text{Bi}_2(\text{O}_8\text{C}_{34}\text{H}_{20})(\text{O}_8\text{C}_{34}\text{H}_{18})(\text{H}_2\text{O})_2] \cdot 10.5 \text{ H}_2\text{O}$ . The final product was identified as  $\alpha\text{-Bi}_2\text{O}_3$ .

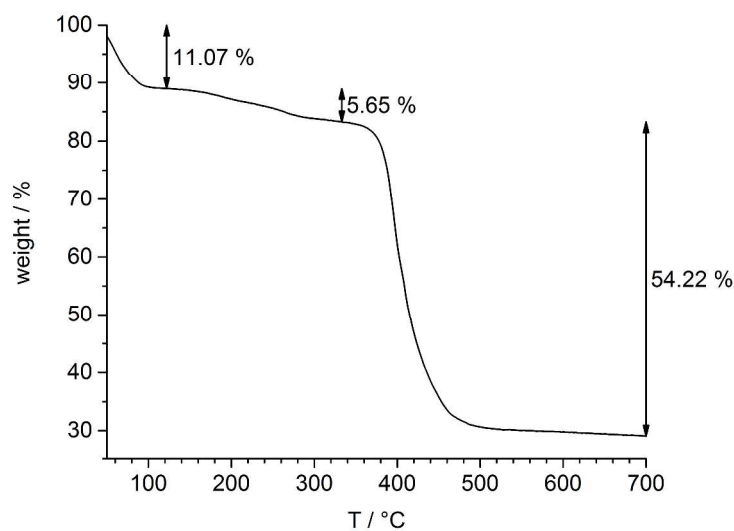

**Fig. S18:** Measured TG-curve of CAU-32 (*as*). The measured weight losses match the theoretical values for the loss of water (12.01 %), dimethyl ammonium (5.12 %) and decomposition of the linker (58.97 %), calculated using the formula  $(\text{NH}_2(\text{CH}_3)_2)[\text{Bi}(\text{O}_8\text{C}_{34}\text{H}_{18})(\text{H}_2\text{O})] \cdot 5 \text{H}_2\text{O}$ . The final product was identified as  $\alpha\text{-Bi}_2\text{O}_3$ .

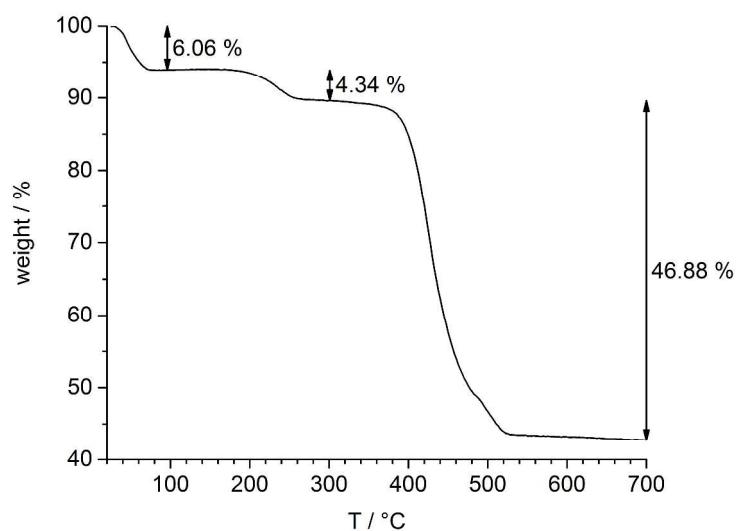

**Fig. S19:** Measured TG-curve of  $\beta$ -CAU-33. The measured weight losses match the theoretical values for the loss of water (6.07 %), DMF (4.56 %) and decomposition of the linker (48.00 %), calculated using the formula  $[\text{Bi}_4(\text{O})_2(\text{OH})_2(\text{O}_8\text{C}_{34}\text{H}_{20})(\text{O}_8\text{C}_{34}\text{H}_{18})(\text{H}_2\text{O})_2] \cdot 5.6 \text{H}_2\text{O} \cdot 1.4\text{DMF}$ . The final product was identified as  $\alpha\text{-Bi}_2\text{O}_3$ .

## 6. Sorption measurements

The measured isotherms of CAU-31, CAU-32 and CAU-33 are shown in Fig. S20 – Fig. S24. The analyses, measurement parameters as well as the activation procedures are given in the figure captions.

### 6.1. CAU-31

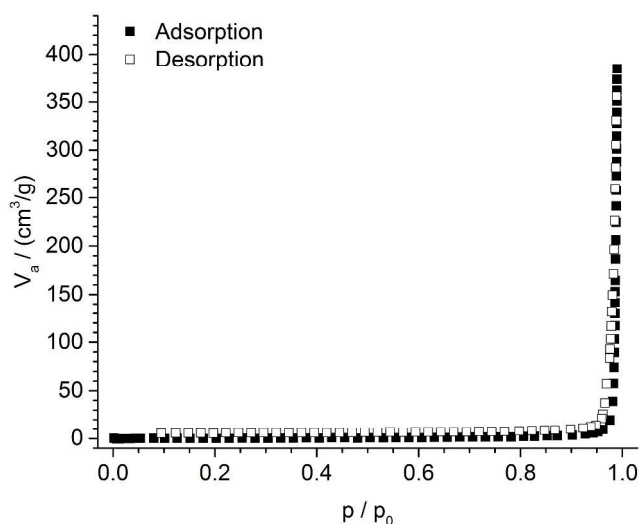

**Fig. S20:**  $\text{N}_2$  sorption isotherm of CAU-31 recorded at 77 K. This graph proves that CAU-31 is not porous towards nitrogen. The sample was activated for 16 h at 100 °C under reduced pressure.

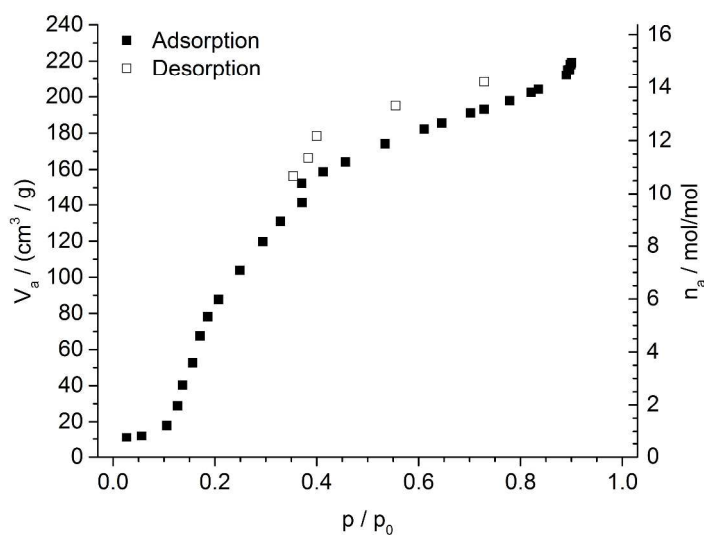

**Fig. S21:**  $\text{H}_2\text{O}$  sorption isotherm of CAU-31 recorded at 303 K. CAU-31 shows water uptake of 14.95 mol/mol and thus is a porous material. The sample was activated for 16 h at 100 °C under reduced pressure.

## 6.2. CAU 32

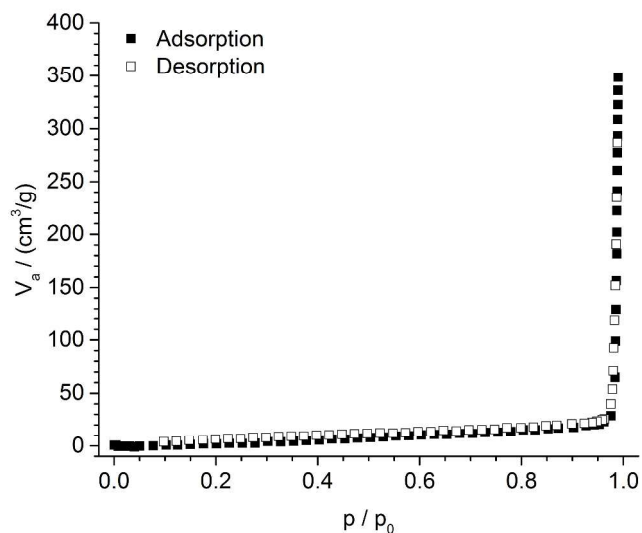

**Fig. S22:**  $\text{N}_2$  sorption isotherm of CAU-32 recorded at 77 K. This graph proves that CAU-32 is not porous towards nitrogen. The sample was activated for 12 h at 150 °C under reduced pressure.

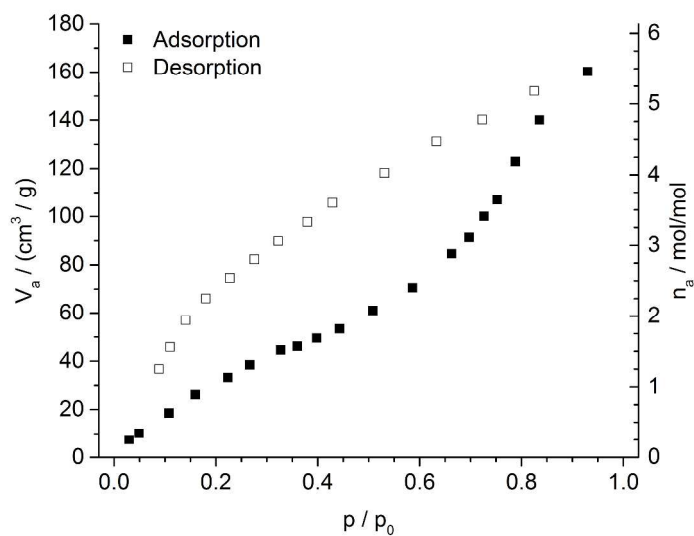

**Fig. S23:**  $\text{H}_2\text{O}$  sorption isotherm of CAU-32 recorded at 298 K. CAU-32 shows water uptake of 5.46 mol/mol and thus is a porous material. The sample was activated for 12 h at 120 °C under reduced pressure.

### 6.3. CAU-33

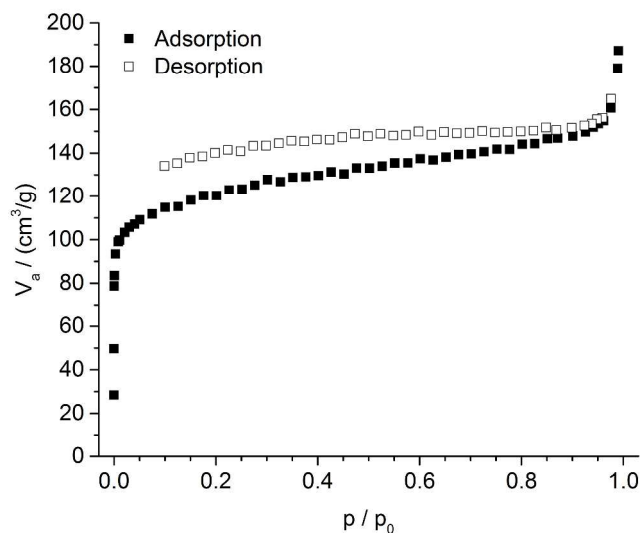

**Fig. S24:** N<sub>2</sub> sorption isotherm of CAU-33 recorded at 77 K. In this graph a type I(a) isotherm was observed, which confirms the microporosity of the sample. The BET surface area was determined to be  $a_{\text{BET}} = 450 \text{ m}^2/\text{g}$  and the micropore volume to be  $V_{\text{mic}} = 0.21 \text{ cm}^3/\text{g}$ . The sample was activated for 12 h at 150 °C under reduced pressure.

## 7. Infrared spectra

The measured IR spectra of CAU-31, CAU-32 (*as*) and  $\beta$ -CAU-33 are shown in Fig. S25 - Fig. S27. The analyses of the characteristic frequencies are given in the figure captions.

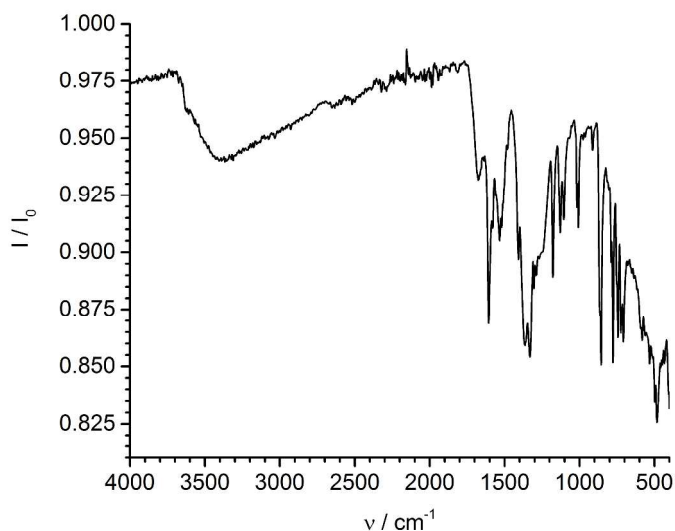

**Fig. S25:** IR spectrum of CAU-31. Characteristic frequencies: 3700-2700  $\text{cm}^{-1}$  ( $\nu(\text{OH})$ , water), 1677  $\text{cm}^{-1}$  ( $\nu_{\text{as}}(\text{C-O})$ , carboxylate), 1619  $\text{cm}^{-1}$ , 1609  $\text{cm}^{-1}$  ( $\nu_{\text{s}}(\text{C-C})$ , linker), 1534  $\text{cm}^{-1}$  ( $\nu_{\text{as}}(\text{C-O})$ , carboxylate), 1368  $\text{cm}^{-1}$ , 1331  $\text{cm}^{-1}$  ( $\nu(\text{OC-OH})$ , carboxylic acid), 1178  $\text{cm}^{-1}$ , 1128  $\text{cm}^{-1}$ , 1104  $\text{cm}^{-1}$ , 1008  $\text{cm}^{-1}$ , 856  $\text{cm}^{-1}$ , 777  $\text{cm}^{-1}$ , 744  $\text{cm}^{-1}$ , 724  $\text{cm}^{-1}$ , 707  $\text{cm}^{-1}$  ( $\gamma(\text{aryl-H})$ , linker).

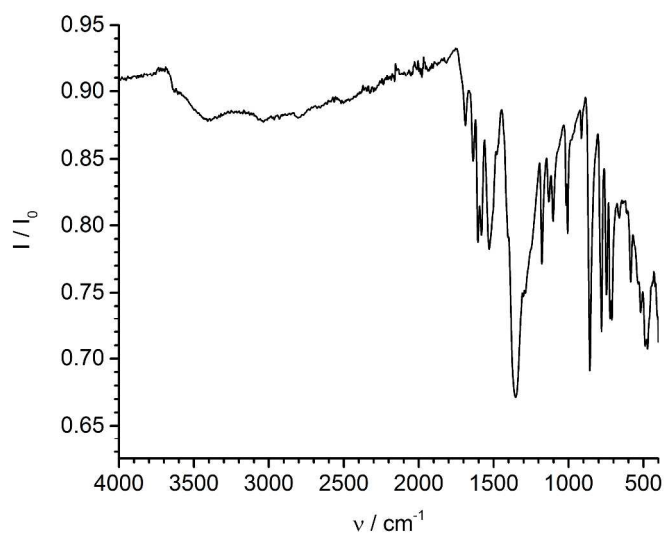

**Fig. S26:** IR spectrum of CAU-32 (*as*). Characteristic frequencies: 3700-2700  $\text{cm}^{-1}$  ( $\nu(\text{OH})$ , water), 3035  $\text{cm}^{-1}$ , 2964  $\text{cm}^{-1}$ , 2929  $\text{cm}^{-1}$ , 2805  $\text{cm}^{-1}$ , 2502  $\text{cm}^{-1}$  ( $\nu_{\text{as}}(\text{N-H})$ ,  $\text{H}_2\text{N}(\text{CH}_3)_2^+$ ), 1688  $\text{cm}^{-1}$  ( $\nu_{\text{as}}(\text{C-O})$ , carboxylate), 1637  $\text{cm}^{-1}$ , 1605  $\text{cm}^{-1}$  ( $\nu_{\text{s}}(\text{C-C})$ , linker), 1581  $\text{cm}^{-1}$  ( $\delta(\text{N-H})$ ,  $\text{H}_2\text{N}(\text{CH}_3)_2^+$ ), 1530  $\text{cm}^{-1}$  ( $\nu_{\text{as}}(\text{C-O})$ , carboxylate), 1352  $\text{cm}^{-1}$ , 1287  $\text{cm}^{-1}$ , 1301  $\text{cm}^{-1}$  ( $\nu(\text{C-N})$ ,  $\text{H}_2\text{N}(\text{CH}_3)_2^+$ ), 1178  $\text{cm}^{-1}$ , 1131  $\text{cm}^{-1}$ , 1103  $\text{cm}^{-1}$ , 1007  $\text{cm}^{-1}$  ( $\gamma(\text{aryl-H})$ , linker), 914  $\text{cm}^{-1}$  ( $\gamma(\text{C-H}_3)$ ,  $\text{H}_2\text{N}(\text{CH}_3)_2^+$ ), 858  $\text{cm}^{-1}$ , 780  $\text{cm}^{-1}$ , 747  $\text{cm}^{-1}$ , 723  $\text{cm}^{-1}$ , 710  $\text{cm}^{-1}$  ( $\gamma(\text{aryl-H})$ , linker).

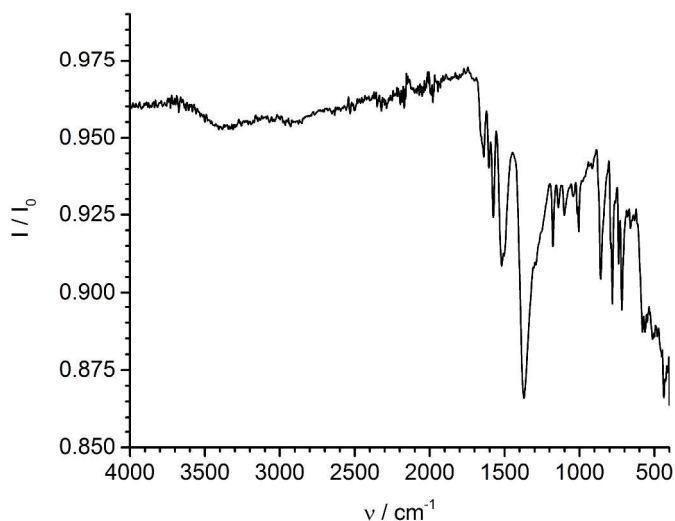

**Fig. S27:** IR spectrum of CAU-33 ( $\beta$ ). Characteristic frequencies: 3700-2700  $\text{cm}^{-1}$  ( $\nu(\text{OH})$ , water), 1638  $\text{cm}^{-1}$ , 1605  $\text{cm}^{-1}$  ( $\nu_{\text{s}}(\text{C-C})$ , linker), 1576, 1520  $\text{cm}^{-1}$  ( $\nu_{\text{as}}(\text{C-O})$ , carboxylate), 1371  $\text{cm}^{-1}$  ( $\nu(\text{OC-OH})$ , carboxylic acid), 1178  $\text{cm}^{-1}$ , 1141  $\text{cm}^{-1}$ , 1102  $\text{cm}^{-1}$ , 1005  $\text{cm}^{-1}$ , 859  $\text{cm}^{-1}$ , 781  $\text{cm}^{-1}$ , 739  $\text{cm}^{-1}$ , 717  $\text{cm}^{-1}$  ( $\gamma(\text{aryl-H})$ , linker). The weak bands between 2500  $\text{cm}^{-1}$  and 2000  $\text{cm}^{-1}$  are most likely caused by DMF guest molecules.

## 8. NMR spectroscopy

To confirm that the charge of the anionic network of CAU-32 (*as*) is balanced by  $[\text{NH}_2(\text{CH}_3)_2]^+$  ( $\text{DMA}^+$ ) ions,  $^1\text{H}$ -NMR spectroscopy was performed on the dissolved sample (Fig. S28).

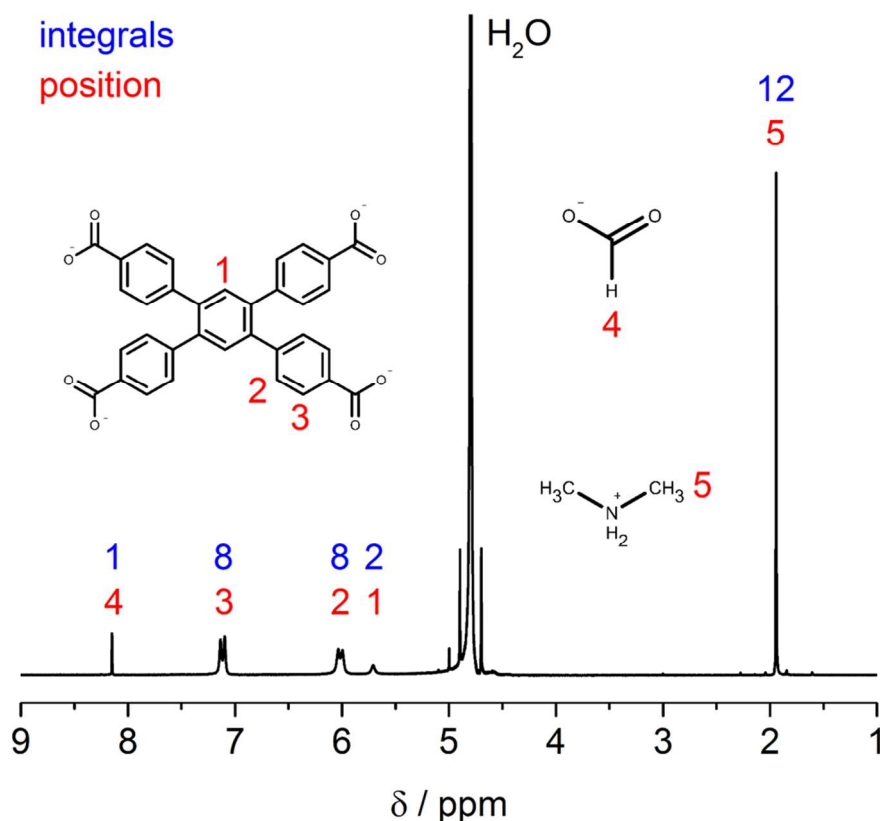

**Fig. S28:**  $^1\text{H}$ -NMR spectrum of CAU-32 (*as*) dissolved in 5% NaOD/ $\text{D}_2\text{O}$ . The treatment of DMF with NaOD leads to a decomposition into formate ions and  $\text{DMA}^+$  ions. The signal at 8.15 ppm corresponds to 1 formate ion. Since the signal of the  $\text{CH}_3$ -groups of the  $\text{DMA}^+$  ions at 1.94 ppm corresponds to 12 protons, the ratio DMF: $\text{DMA}^+$  was originally 1:1 in the MOF. In addition, the signals of the TCPB $^{4-}$  linker confirm a ratio of  $\text{DMA}^+:\text{TCPB}^{4-}$  of 1:1. This analysis proves that  $\text{DMA}^+$  is incorporated in the structure as counter ion.  $^1\text{H}$ -NMR (200MHz, NaOD/ $\text{D}_2\text{O}$ ):  $\delta$  = 8.15 (1H, s), 7.12 (8H, d), 6.02 (8H, d), 5.70 (2H, s), 1.94 (12H, s) ppm.



## 9. Chemical stability tests

The PXRD patterns of the samples, after performing the chemical stability experiments with CAU-31, CAU-32 and  $\beta$ -CAU-33 are shown in Fig. S29 - Fig. S37. More details on the procedure can be found in the experimental section of the main article.

### 9.1. CAU-31

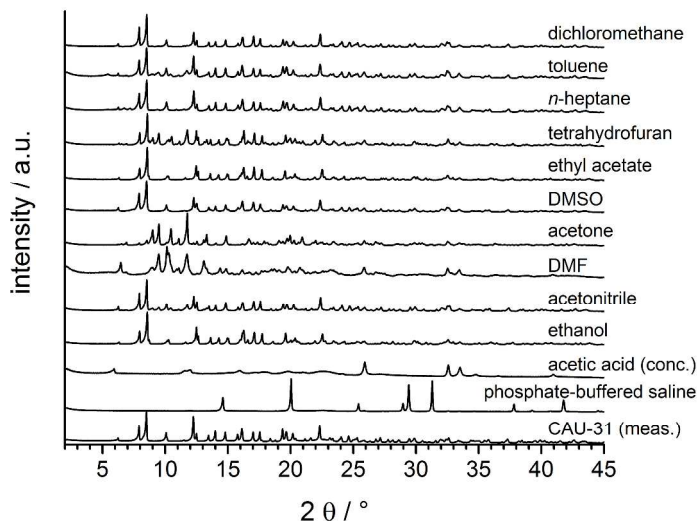

**Fig. S29:** PXRD patterns of the samples, after performing the chemical stability experiment with CAU-31 in various solvents. The resulting product in phosphate buffered saline was identified as  $\text{BiPO}_4$ .<sup>6</sup> The resulting products in DMF and acetone could not be identified.

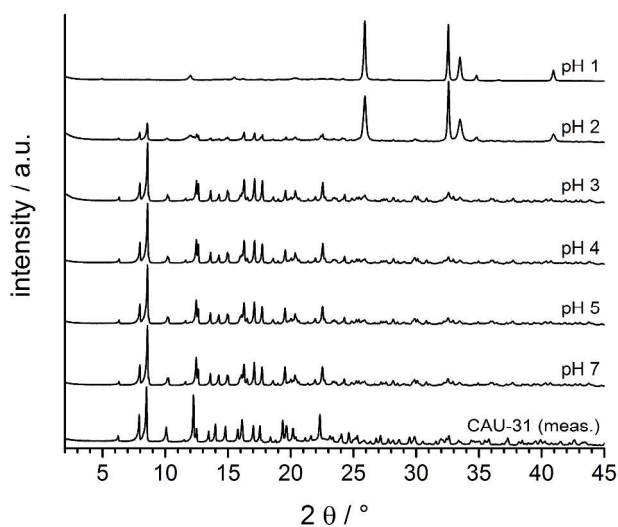

**Fig. S30:** PXRD patterns of the samples, after performing the chemical stability experiment with CAU-31 in aqueous HCl solutions between pH 1-7. The resulting products at pH 1-2 were identified as  $\text{BiOCl}$ .<sup>7</sup>

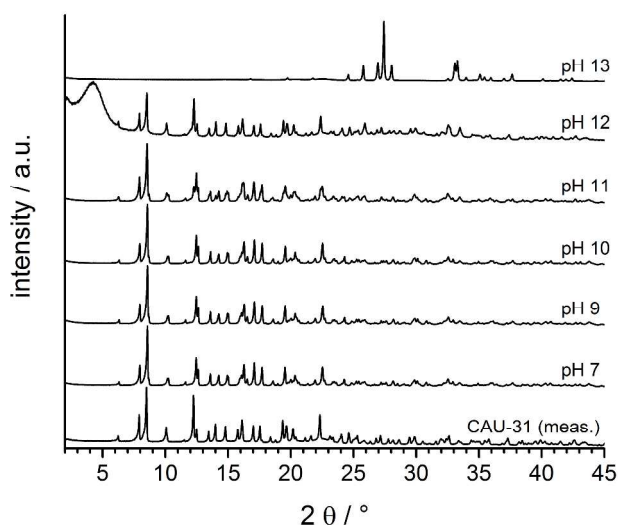

**Fig. S31:** PXRD patterns of the samples, after performing the chemical stability experiment with CAU-31 in aqueous NaOH solutions between pH 7-13. The resulting product at pH 13 was identified as  $\alpha$ - $\text{Bi}_2\text{O}_3$ .<sup>8</sup>

## 9.2. CAU-32

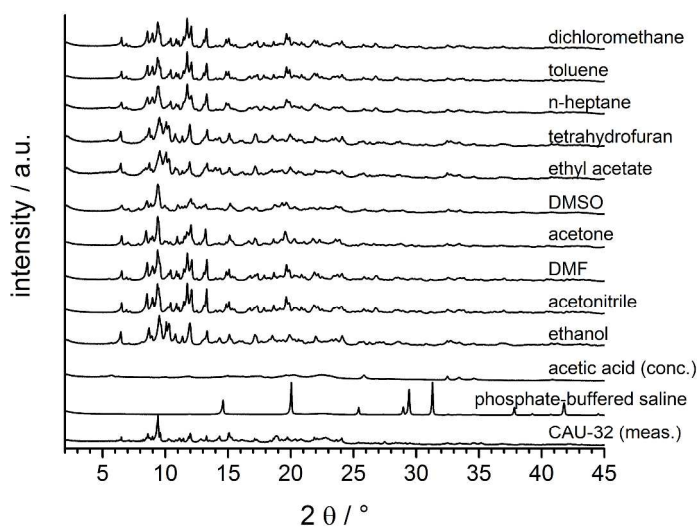

**Fig. S32:** PXRD patterns of the samples, after performing the chemical stability experiment with CAU-32 in various solvents. The resulting product in phosphate buffered saline was identified as  $\text{BiPO}_4$ .<sup>6</sup> The resulting product in DMSO could not be identified.

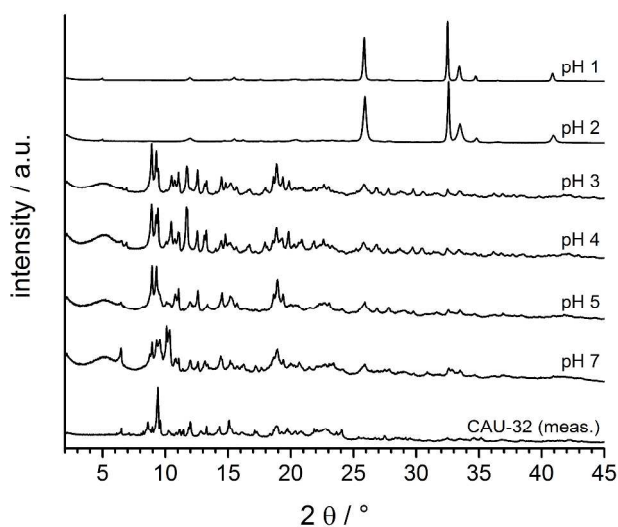

**Fig. S33:** PXRD patterns of the samples, after performing the chemical stability experiment with CAU-32 in aqueous HCl solutions between pH 1-7. The resulting products at pH 1-2 were identified as BiOCl.<sup>7</sup>

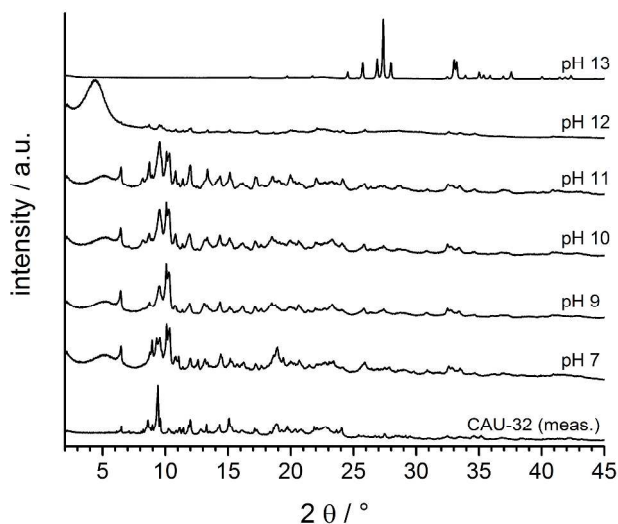

**Fig. S34:** PXRD patterns of the samples, after performing the chemical stability experiment with CAU-32 in aqueous NaOH solutions between pH 7-13. The resulting product at pH 13 was identified as  $\alpha$ -Bi<sub>2</sub>O<sub>3</sub>.<sup>8</sup>

### 9.3. CAU-33

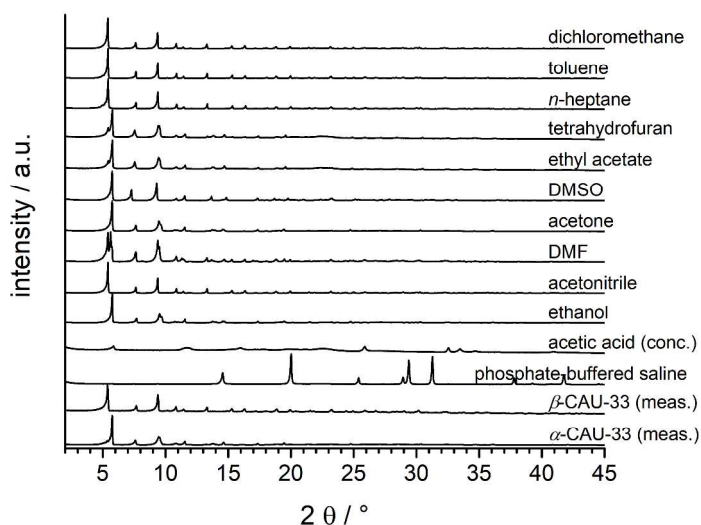

**Fig. S35:** PXRD patterns of the samples, after performing the chemical stability experiment with  $\beta$ -CAU-33 in various solvents. The resulting product in phosphate buffered saline was identified as  $\text{BiPO}_4$ .<sup>6</sup>

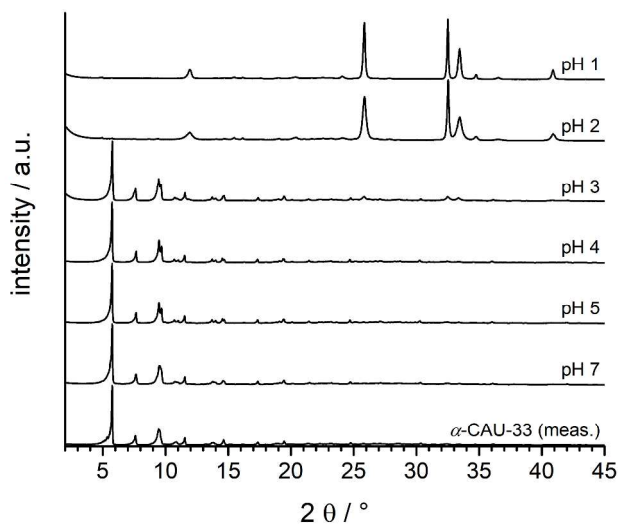

**Fig. S36:** PXRD patterns of the samples, after performing the chemical stability experiment with  $\beta$ -CAU-33 in aqueous HCl solutions between pH 1-7. The resulting products at pH 1-2 were identified as  $\text{BiOCl}$ .<sup>7</sup>

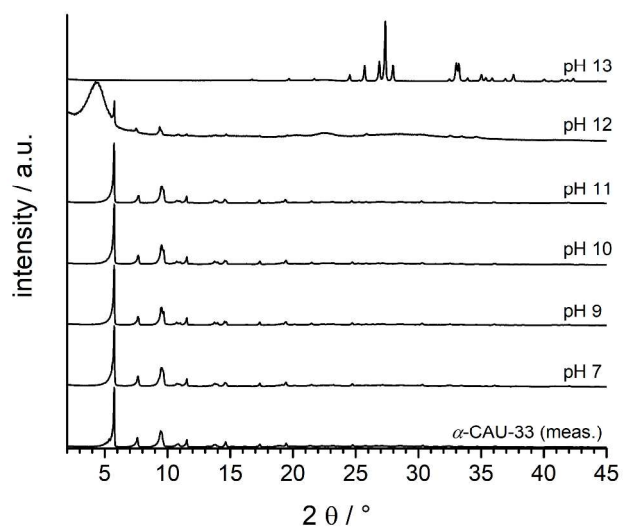

**Fig. S37:** PXRD patterns of the samples, after performing the chemical stability experiment with  $\beta\text{-CAU-33}$  in aqueous NaOH solutions between pH 7-13. The resulting product at pH 13 was identified as  $\alpha\text{-Bi}_2\text{O}_3$ .<sup>8</sup>

## 10. References

- (1) A. Coelho. *TOPAS Academic 6*; Coelho Software, 2016.
- (2) Gemmi, M.; La Placa, M. G. I.; Galanis, A. S.; Rauch, E. F.; Nicolopoulos, S. Fast electron diffraction tomography. *J. Appl. Crystallogr.* **2015**, *48*, 718–727.
- (3) Wan, W.; Sun, J.; Su, J.; Hovmöller, S.; Zou, X. Three-dimensional rotation electron diffraction: Software RED for automated data collection and data processing. *J. Appl. Crystallogr.* **2013**, *46*, 1863–1873.
- (4) Kabsch, W. Integration, scaling, space-group assignment and post-refinement. *Acta Crystallogr., Sect. D: Biol. Crystallogr.* **2010**, *66*, 133–144.
- (5) Sheldrick, G. M. SHELXT - integrated space-group and crystal-structure determination. *Acta Crystallogr., Sect. A: Found. Adv.* **2015**, *71*, 3–8.
- (6) PDF database. bismuth phosphate, [15-766].
- (7) Keramidas, K. G.; Voutsas, G. P.; Rentzeperis, P. I. The crystal structure of BiOCl. *Z. Kristallogr. - Cryst. Mater.* **1993**, *205*, DOI: 10.1524/zkri.1993.205.12.35.
- (8) Sillén, L. G. Die Kristallstruktur des monoklinen  $\alpha$ -Bi<sub>2</sub>O<sub>3</sub>. *Naturwissenschaften* **1940**, *28*, 206–207.
